# Supplementary material for: The Mitochondrial Unfolded Protein Response Protects against Anoxia in Caenorhabditis elegans
Source: PubMed Central journal article supplement (PMC4961406; doi:10.1371/journal.pone.0159989), 2016-07-26

# S1 Fig

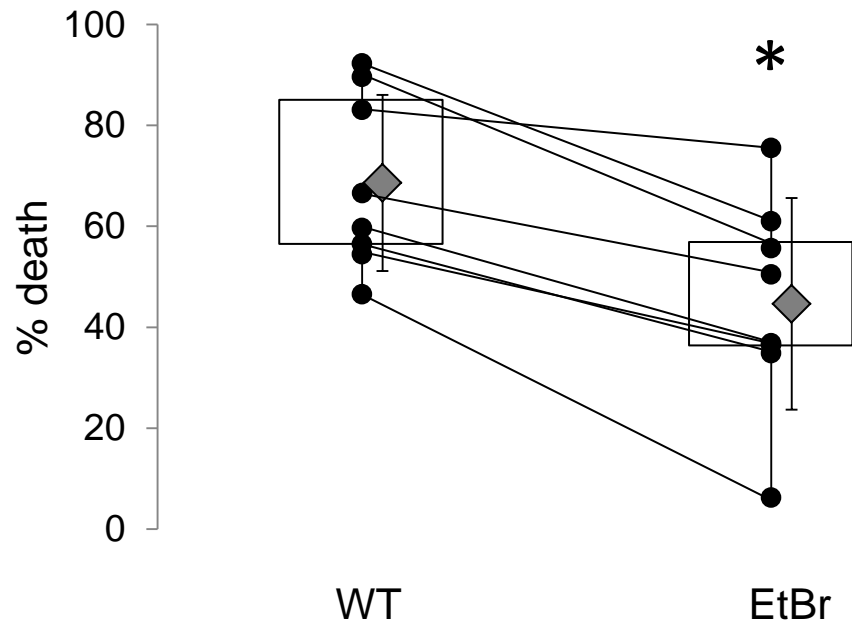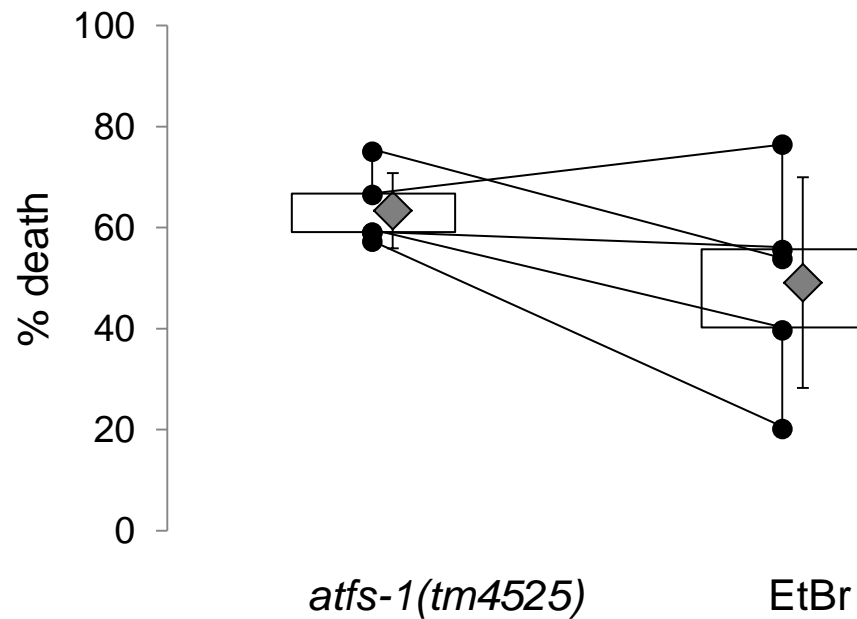

Supplement: pone.0159989.s001.pdf [file pone.0159989.s001.pdf]
