# Supplementary material for: The Mitochondrial Unfolded Protein Response Protects against Anoxia in Caenorhabditis elegans
Source: PubMed Central journal article supplement (PMC4961406; doi:10.1371/journal.pone.0159989), 2016-07-26

# S3 Fig.

|                             |                     |                     |                     |                     |                    |
|-----------------------------|---------------------|---------------------|---------------------|---------------------|--------------------|
| FLP:                        | -                   | -                   | <i>Prab-3::FLP</i>  | <i>Prab-3::FLP</i>  | <i>Prab-3::FLP</i> |
| MosSCI:                     | -                   | -                   | MosSCI(et15)        | MosSCI(et15)        | MosSCI(et15)       |
| UPR <sup>mt</sup> reporter: | <i>Phsp-60::GFP</i> | <i>Phsp-60::GFP</i> | <i>Phsp-60::GFP</i> | <i>Phsp-60::GFP</i> | -                  |
| Treatment:                  | Control             | EtBr                | Control             | EtBr                | EtBr               |

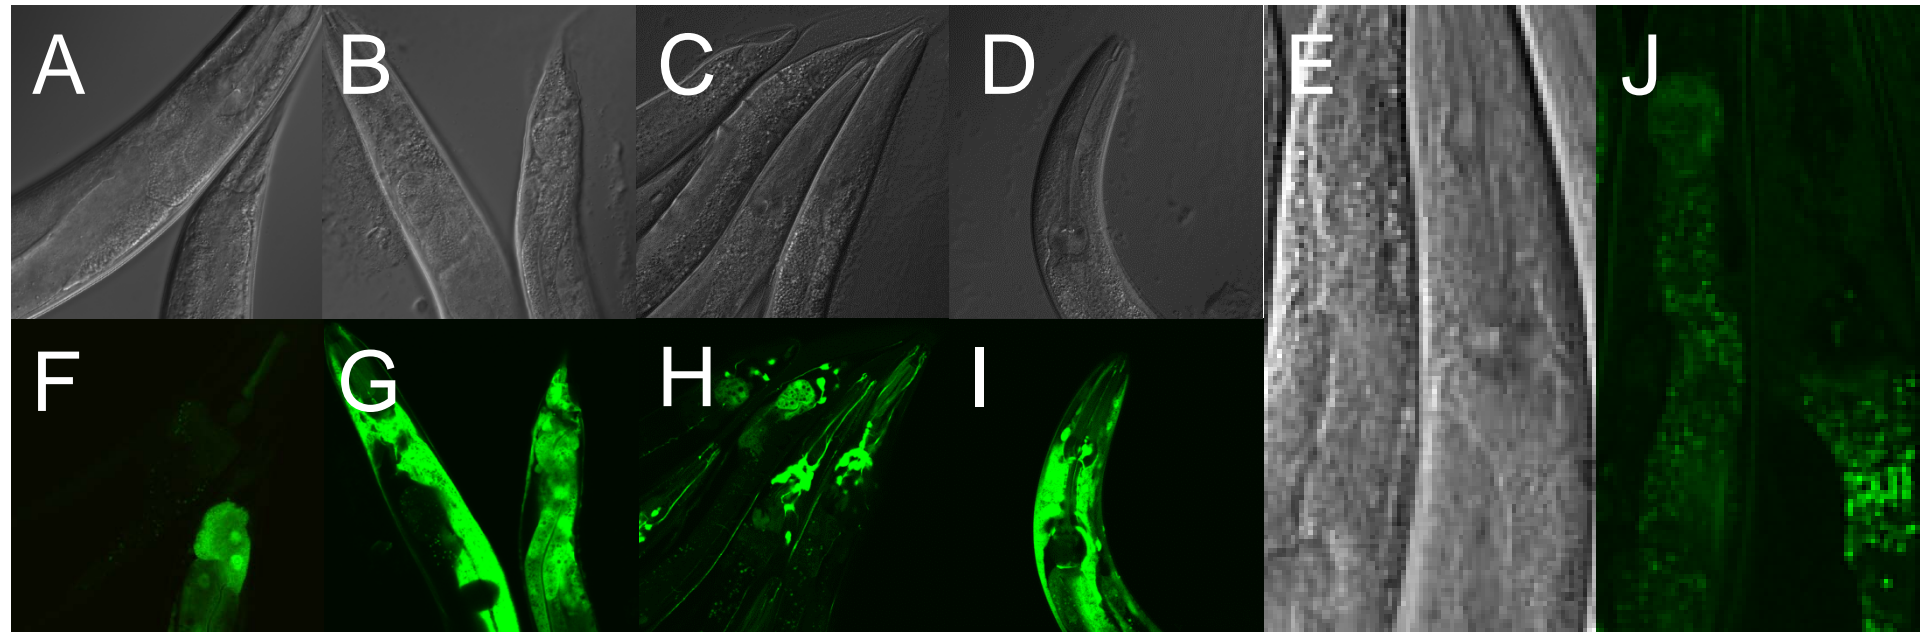

Supplement: pone.0159989.s003.pdf [file pone.0159989.s003.pdf]
